# Supplementary material for: Carbon-enveloped pea-shaped vanadium nitride nanorods for aqueous zinc ion batteries
Source: Royal Society of Chemistry journal article supplement (doi:10.1039/d4tc00522h), 2024-01-01
Supplement: d4tc00522h1.pdf [file d4tc00522h1.pdf]

## Supporting Information

### Carbon-Enveloped Pea-Shaped Vanadium Nitride Nanorods for Aqueous Zinc Ion Batteries

Shijun Luo<sup>a\*</sup>, Jianyang Cui<sup>a</sup>, Shaojia Liang<sup>a</sup>, Yan Guo<sup>a</sup>, Baohe Yuan<sup>a</sup>, Lei Xu<sup>a</sup>, Rui Zheng<sup>a</sup>, Junming, Li<sup>a</sup>, Wenpeng Yang<sup>a</sup>, Menglin Chen<sup>b</sup>, Yang Lu<sup>b</sup>, Yongsong Luo<sup>c\*</sup>

<sup>a</sup> School of Electronic Engineering, North China University of Water Resources and Electric Power, Zhengzhou 450046, China

<sup>b</sup> College of Physics and Electronic Engineering, Xinyang Normal University, Xinyang 464000, China

<sup>c</sup> College of Physics and Electronic Engineering, Nanyang Normal University, Nanyang 473061, China

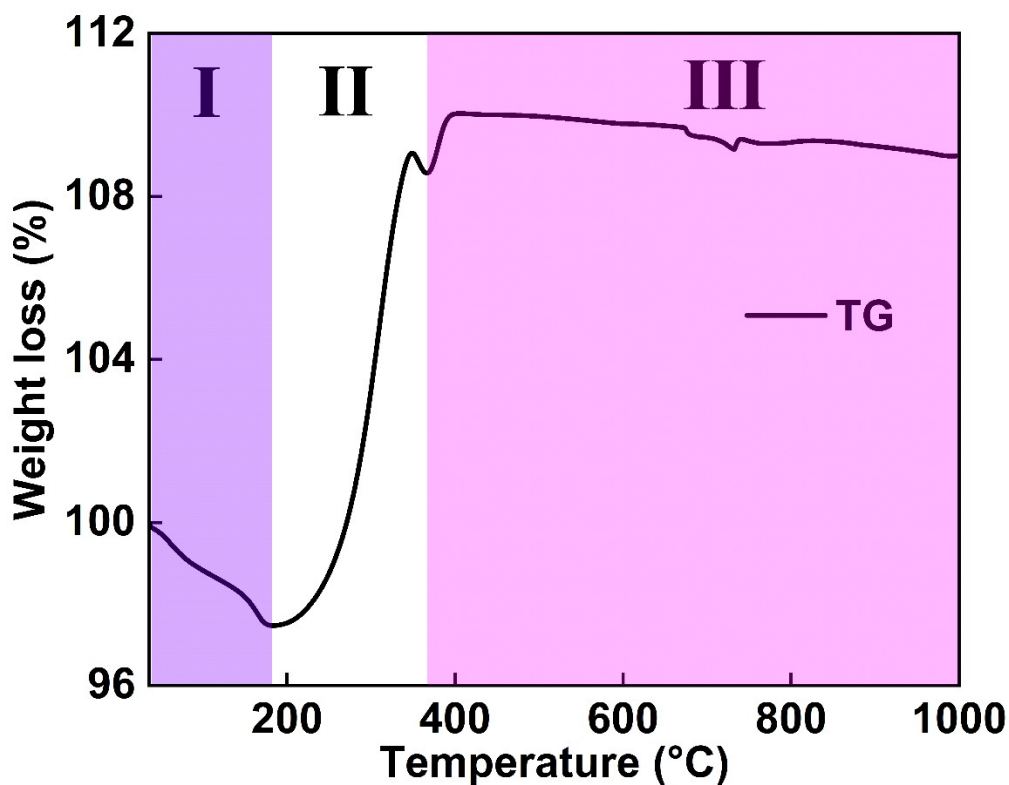

Figure S1. TG curve of the VNC.

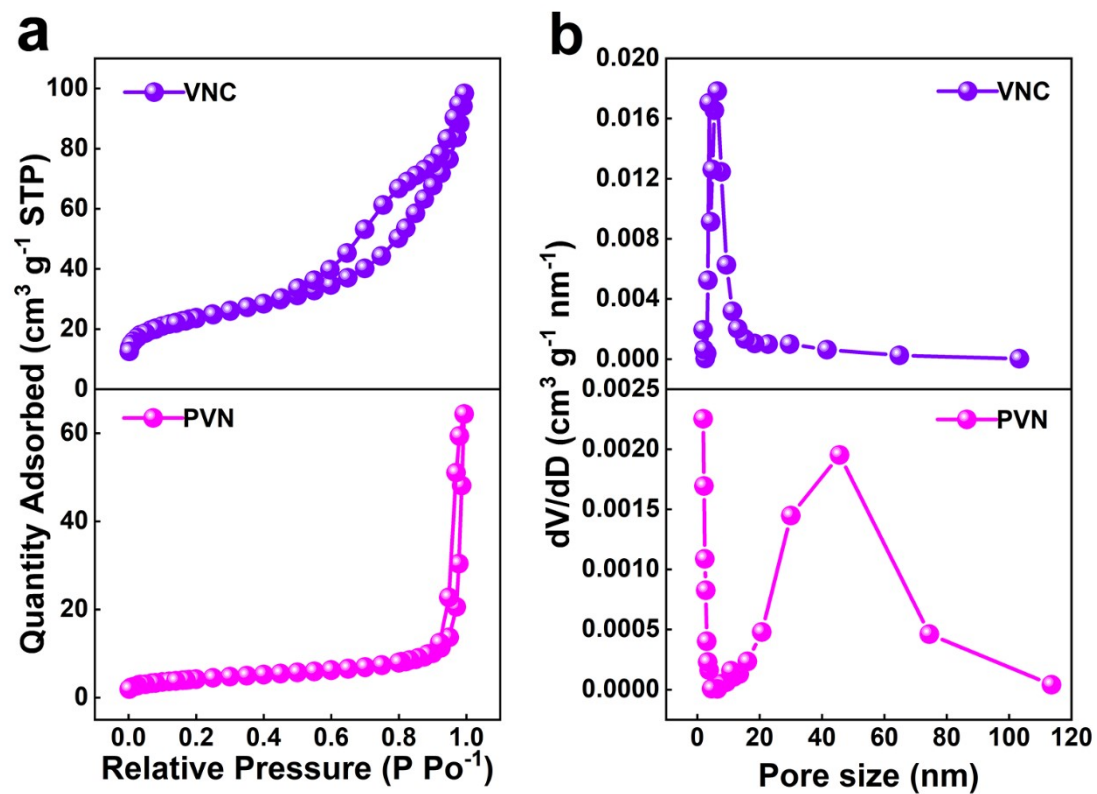

**Figure S2.**  $\text{N}_2$  adsorption-desorption isotherms of (a) VNC and PVN, the corresponding pore size distribution profiles of (b) VNC and PVN

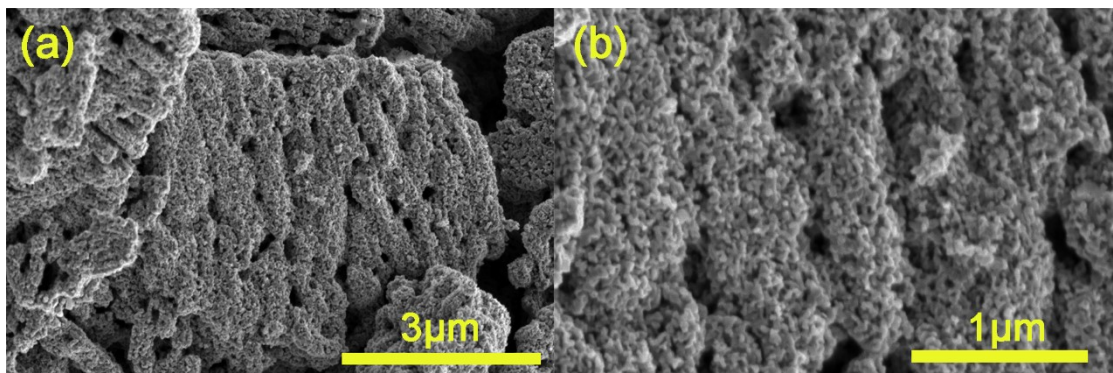

**Figure S3.** SEM images of the PVN.

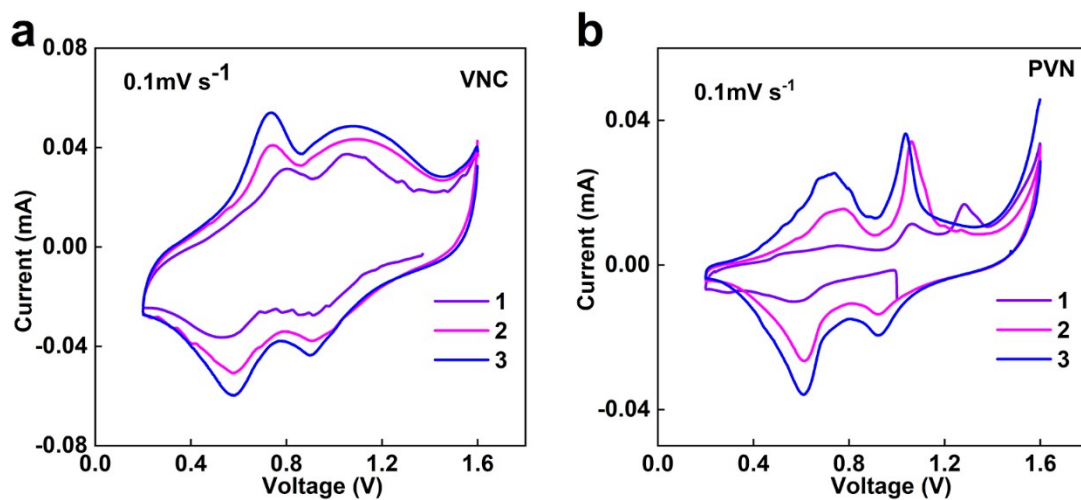

**Figure S4.** (a, b) CV curves of the initial three cycles for VNC and PVN electrodes at 0.1 mV s<sup>-1</sup>.

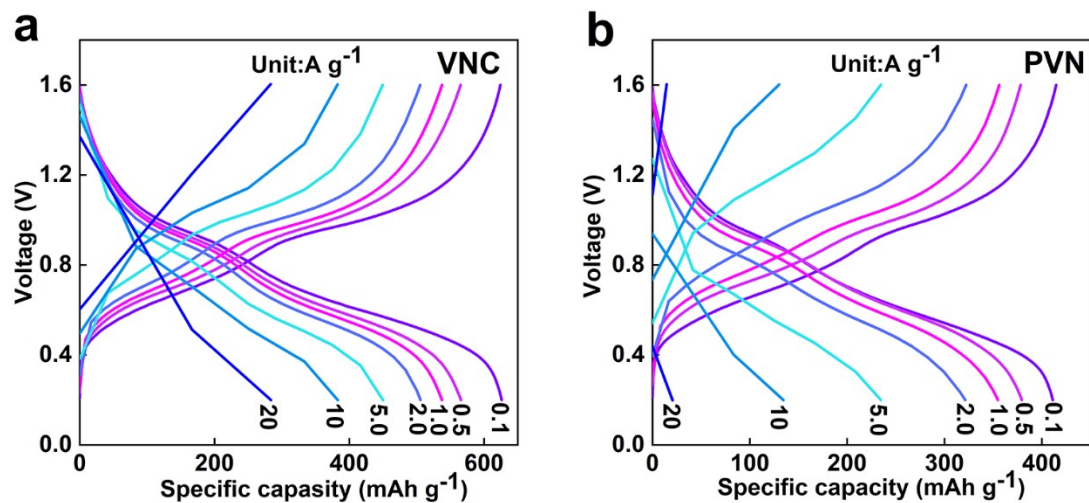

**Figure S5.** (a, b) GCD curves of the VNC and PVN electrodes at different current densities at 0.1, 0.5, 1, 2, 5, 10 and 20 A g<sup>-1</sup>.

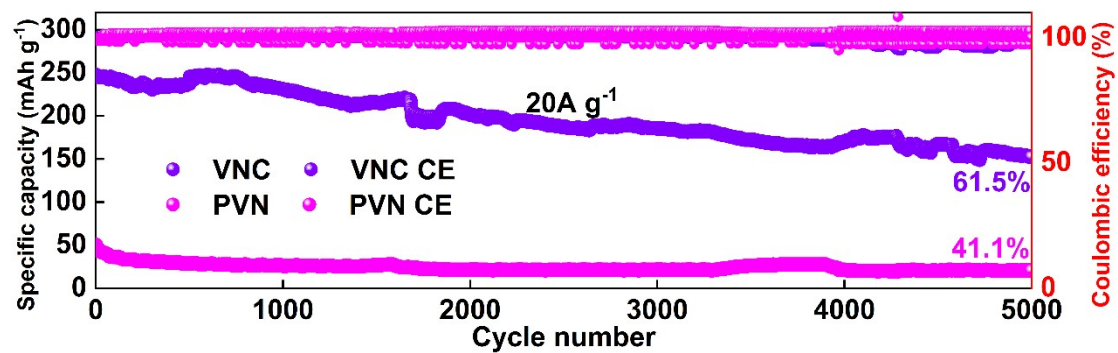

Figure S6. Cycling performance of the VNC and PVN electrode at 20 A g<sup>-1</sup>.

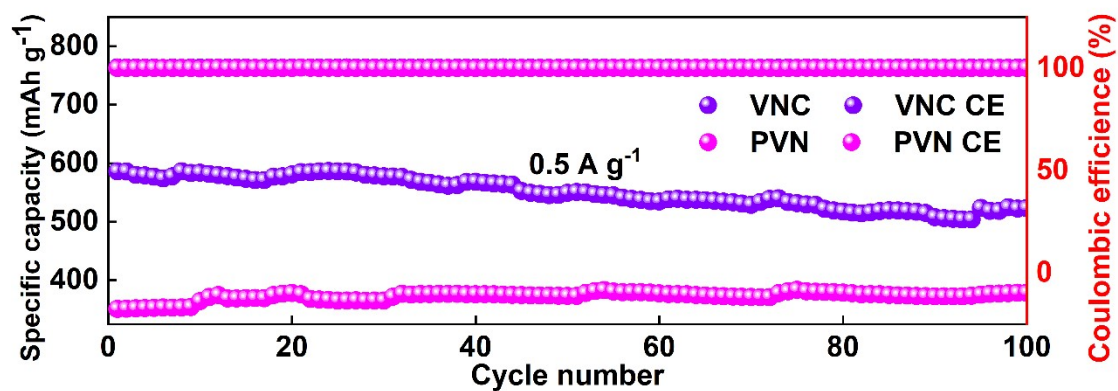

Figure S7. Cycling performance of the VNC and PVN electrode at 0.5 A g<sup>-1</sup>.

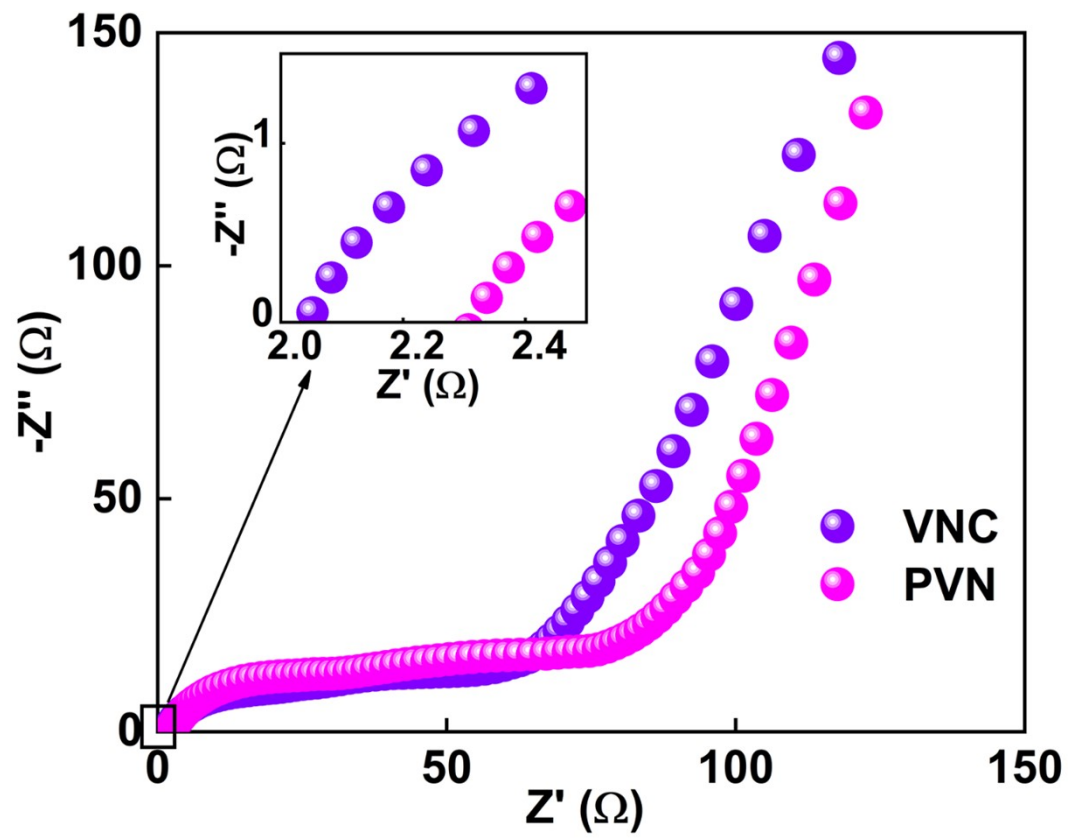

**Figure S8.** EIS plots of VNC and PVN electrode after 10 cycles.

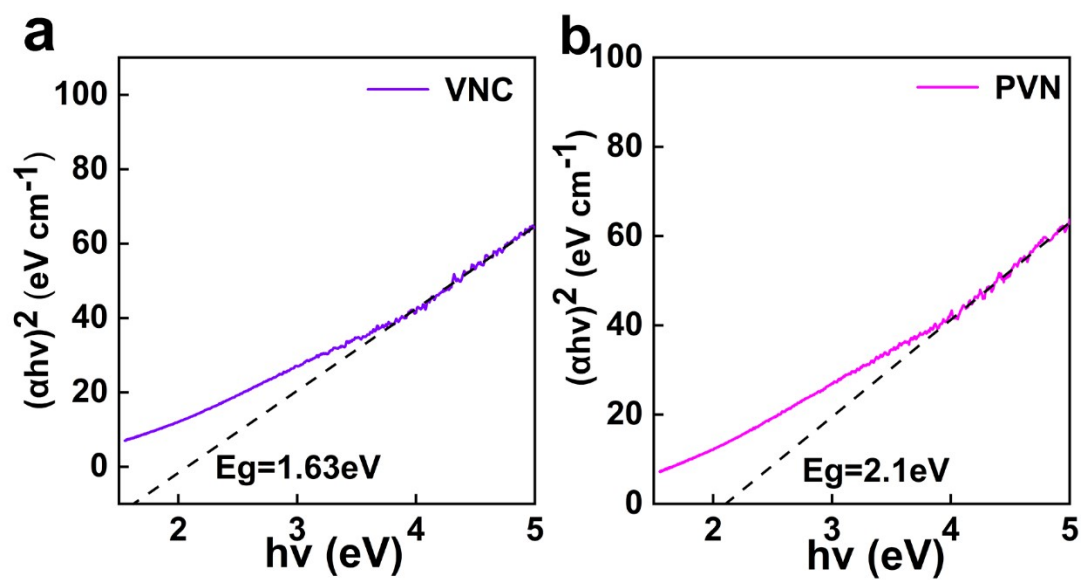

Figure S9. The band gaps of the VNC and PV

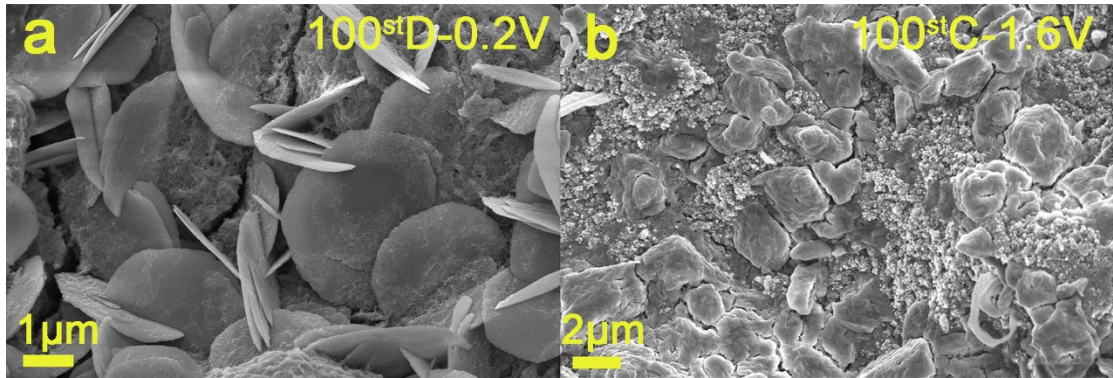

**Figure S10.** (a, b) Ex-situ SEM images of the VNC electrode at various states after 100 cycles.



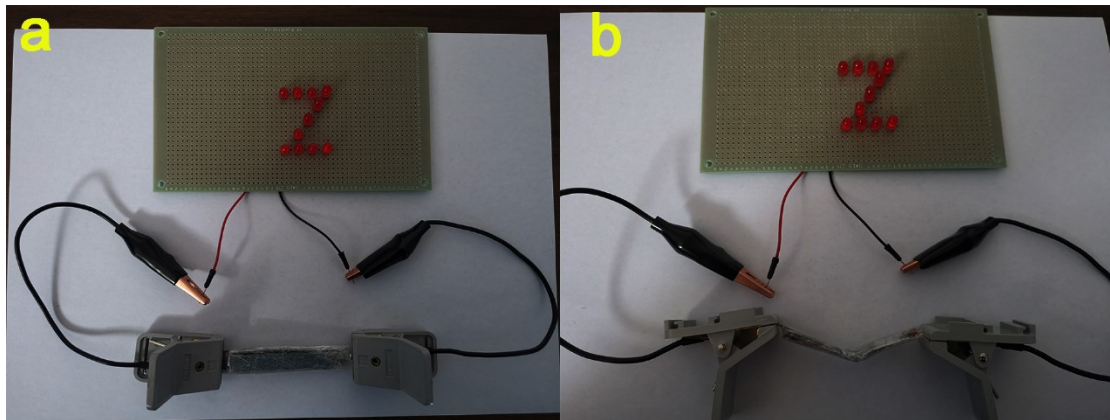

**Figure S11.** Performance of zinc-VNC flexible batteries under different bending angles

**Table S1.** Specific surface area and pore size parameters of the VNC and PVN.

| Samples | Surface area<br>(m <sup>2</sup> g <sup>-1</sup> ) | Pore volume<br>(cm <sup>3</sup> g <sup>-1</sup> ) | Average pore size<br>(nm) |
|---------|---------------------------------------------------|---------------------------------------------------|---------------------------|
| VNC     | 82.6741                                           | 0.114491                                          | 8.4403                    |
| PVN     | 15.1694                                           | 0.096528                                          | 31.3999                   |

**Table S2.** The atomic content of V, N, and C elements in the XPS characterization of the VNC.

| Elements<br>Samples | Atomic content (%) |       |       |
|---------------------|--------------------|-------|-------|
|                     | V                  | N     | C     |
| VNC                 | 45.64              | 33.12 | 21.24 |

**Table S3.** Comparison of the electrochemical performance for this work with the reported AZIBs.

| Materials                                                              | Capacity (mAh g <sup>-1</sup> )<br>Current density (A g <sup>-1</sup> ) | Capacity (mAh g <sup>-1</sup> )<br>High current density (A g <sup>-1</sup> ) | Capacity Retention<br>Cycles Number,<br>Current density (A g <sup>-1</sup> ) | Maximum energy density (Wh kg <sup>-1</sup> )<br>and power density (W kg <sup>-1</sup> ) | Ref.             |
|------------------------------------------------------------------------|-------------------------------------------------------------------------|------------------------------------------------------------------------------|------------------------------------------------------------------------------|------------------------------------------------------------------------------------------|------------------|
| <b>VNC</b>                                                             | <b>630<br/>(0.1)</b>                                                    | <b>360<br/>(5.0)</b>                                                         | <b>83%<br/>(3000, 10.0)</b>                                                  | <b>560.41<br/>32728.8</b>                                                                | <b>This work</b> |
| VN@rGO                                                                 | 306.6<br>(0.1)                                                          | 129.4<br>(20.0)                                                              | 91.24%<br>(10900,20.0)                                                       | 246.5,<br>10938.95                                                                       | [21]             |
| VO <sub>2</sub> (B)                                                    | 357<br>(0.1)                                                            | 117 (51.2<br>)                                                               | 91.2%<br>(300,51.2)                                                          | 297,46k                                                                                  | [34]             |
| p-V <sub>2</sub> O <sub>3</sub> -CNT                                   | 398<br>(0.1)                                                            | 211<br>(50.0)                                                                | 83%<br>(5000,10.0)                                                           | 319.16,<br>6330.84                                                                       | [35]             |
| VN <sub>x</sub> O <sub>y</sub> /C                                      | 407.4<br>(0.5)                                                          | 300<br>(5.0)                                                                 | 90%<br>(2000,5)                                                              | 384.1,<br>17307.5                                                                        | [36]             |
| Ca <sub>0.24</sub> V <sub>2</sub> O <sub>5</sub> ·0.83H <sub>2</sub> O | 340<br>(0.2C)                                                           | 72<br>(80C)                                                                  | 96%<br>(3000,80C)                                                            | 267,991                                                                                  | [37]             |
| Na <sub>2</sub> V <sub>6</sub> O <sub>16</sub> ·1.63H <sub>2</sub> O   | 352<br>(0.05)                                                           | 162<br>(2.0)                                                                 | 90%<br>(6000,5.0)                                                            | 251,851                                                                                  | [38]             |
| VS <sub>2</sub>                                                        | 190<br>(0.05)                                                           | 115<br>(2.0)                                                                 | 98%<br>(200,2.0)                                                             | 123,1200                                                                                 | [13]             |

**Table S4.** The value of adsorption energies  $E_a$  (eV) for Zn ion on the surfaces of the VNC and PVN, respectively.

| Model Samples | $E_{total}$ (eV) | $E_h$ (eV) | $E_{Zn}$ (eV) | $E_a$ (eV) |
|---------------|------------------|------------|---------------|------------|
| VNC           | -594.366404      | -593.42442 | -0.009219696  | -0.9304    |
| PVN           | -299.59877       | -298.59428 | -0.009129719  | -0.9953    |
